# Supplementary material
Source: publisher figshare collection journal article supplement (https://acs.figshare.com/ndownloader/files/4194943)
Supplement: Supplementary file 1 [file 4194943]

# Three-Dimensional Ni/TiO<sub>2</sub> Nanowire Network for High Areal Capacity Lithium-Ion Microbattery Applications

*Wei Wang<sup>1,4</sup>, Miao Tian<sup>1,4</sup>, Aziz Abdulagatov<sup>2,4</sup>,*

*Steven George<sup>2,3,4</sup>, Yung-Cheng Lee<sup>1,4</sup> and Ronggui Yang<sup>1,4\*</sup>*

## Author address:

<sup>1</sup> Department of Mechanical Engineering, University of Colorado, Boulder, CO, 80309, USA

<sup>2</sup> Department of Chemical and Biological Engineering, University of Colorado, Boulder, CO, 80309, USA

<sup>3</sup> Department of Chemistry and Biochemistry, University of Colorado, Boulder, CO, 80309, USA

<sup>4</sup> DARPA Center for Integrated Micro/Nano-Electromechanical Transducers (iMINT), University of Colorado, Boulder, CO, 80309, USA

## Author E-mail address:

(W. Wang) [Wei.Wang-1@colorado.edu](mailto:Wei.Wang-1@colorado.edu)

(M. Tian) [mmtian@colorado.edu](mailto:mmtian@colorado.edu)

(A. Abdulagatov) [Aziz.Abdulagatov@colorado.edu](mailto:Aziz.Abdulagatov@colorado.edu)

(S. George) [Steven.George@colorado.edu](mailto:Steven.George@colorado.edu)

(Y. C. Lee) [leeyc@colorado.edu](mailto:leeyc@colorado.edu)

(R. G. Yang) [Ronggui.Yang@Colorado.Edu](mailto:Ronggui.Yang@Colorado.Edu)

Corresponding Author Footnote: Tel: +1-303-735-1003, Fax: +1-303-492-3498, E-mail:

[Ronggui.Yang@Colorado.Edu](mailto:Ronggui.Yang@Colorado.Edu)

## **Section 1: Fabrication of the three-dimensional (3-D) Ni/TiO<sub>2</sub> nanowire network**

### **1.1 Fabrication of 3-D porous anodic alumina (PAA) templates**

The 3-D PAA template used in this study was prepared via a one-step anodization process.<sup>1,2</sup> Prior to the anodization process, the aluminum foil (1000 series Al with 99.5% purity, McMaster 9060K16) was cleaned using acetone and water. The backside of the cleaned Al foil was protected by plastic film with glue. Then, the Al foil was placed in an electrolytic tank containing 30 ml 85 wt% H<sub>3</sub>PO<sub>4</sub>, 400 ml 100 wt% ethanol and 1600 ml water with another Al foil as counter electrode. The anodization took place at -3 °C with a constant DC voltage of 160 V under a continuous stirring. After anodizing for 3 days, the residual aluminum on the backside of the sample was removed in a 1 M CuCl<sub>2</sub> solution. The backside of as-obtained 3-D PAA template was immersed in 3 wt% H<sub>3</sub>PO<sub>4</sub> at 45 °C for 3 hours to remove the dense Al<sub>2</sub>O<sub>3</sub> barrier on bottom and enlarge the size of nanochannels and side-holes.

### **1.2 Fabrication of 3-D Ni nanowire conducting network**

A 50 nm thin gold layer was sputtered on the backside of the PAA templates serving as the conducting seed layer for electroplating Ni nanowires. The electrodeposition was carried out in a three-electrode electrochemical cell (CHI 760c) at room temperature, where a piece of Ni foil was used as the counter electrode. The electrolyte consisted of 270 g L<sup>-1</sup> NiSO<sub>4</sub>·6H<sub>2</sub>O, 40 g L<sup>-1</sup> NiCl<sub>2</sub>·6H<sub>2</sub>O and 40 g L<sup>-1</sup> H<sub>3</sub>BO<sub>3</sub>.<sup>3</sup> An Ag/AgCl electrode was used as reference electrode. A constant voltage of -1 V vs Ag/AgCl was applied between gold seed layer and counter electrode. After the electrodeposition with desirable time, the sample was immersed in 5 M NaOH solution to remove the PAA template. Then the sample was cleaned by water and dried in vacuum oven.

### 1.3 Atomic layer deposition of TiO<sub>2</sub> active material

The deposition of active material TiO<sub>2</sub> on the conducting Ni network was carried out in a viscous-flow, hot-wall type ALD reactor described in detail elsewhere.<sup>4</sup> Deposition was performed in static mode in order to conformably coat the high surface area Ni nanostructures. Ultra high purity (UHP) grade N<sub>2</sub> was used as the carrier gas during the deposition. Base pressure of the reactor was kept at one Torr. Prior to TiO<sub>2</sub> deposition, about 60 Å thick ALD Al<sub>2</sub>O<sub>3</sub> (alumina) was pre-deposited as a seed layer. This layer is needed to insure proper TiO<sub>2</sub> nucleation.<sup>5</sup> The sequential dosing of trimethylaluminum (TMA) and water were used for ALD Al<sub>2</sub>O<sub>3</sub> where titanium tetrachloride (TiCl<sub>4</sub>) and water were used for ALD TiO<sub>2</sub>. The chemistries of ALD Al<sub>2</sub>O<sub>3</sub> and TiO<sub>2</sub> were well studied and understood and has been shown to result in high quality films.<sup>6,7</sup> The coating process was performed at a reaction temperature of 120 °C. At this deposition temperature, both Al<sub>2</sub>O<sub>3</sub> and TiO<sub>2</sub> are in amorphous state.<sup>8,9</sup>

The surface chemistry of the binary reaction sequence during Al<sub>2</sub>O<sub>3</sub> ALD can be described as the following two reactions:<sup>10</sup>

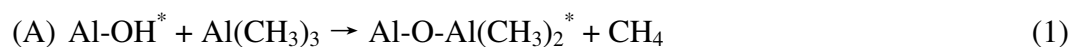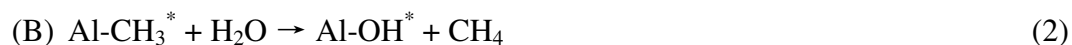

Similarly, the TiO<sub>2</sub> ALD process can be described as follows:<sup>11</sup>

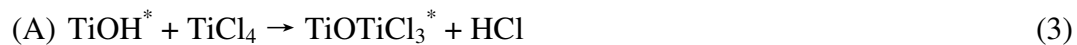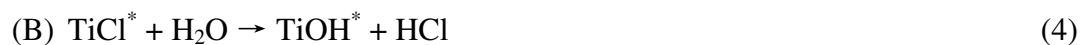

## Section 2: Structural and Electrochemical Characterization

### 2.1 Structural Characterization of ALD films

Figure S1a shows the X-ray diffraction (XRD) pattern of the 32  $\mu\text{m}$ -long 3-D Ni nanowire network before and after applying 50 cycles ALD  $\text{Al}_2\text{O}_3$  and 50 cycles ALD  $\text{Al}_2\text{O}_3$ / 320 cycles ALD  $\text{TiO}_2$  coatings. The three peaks in all three samples can be indexed to (111), (200), (220) as a cubic Ni phase (JCPDS 04-0850). No additional XRD peaks can be observed after applying  $\text{Al}_2\text{O}_3$  and  $\text{Al}_2\text{O}_3/\text{TiO}_2$  coatings, which indicates that ALD  $\text{Al}_2\text{O}_3$  and  $\text{TiO}_2$  coatings are amorphous. The X-ray photoelectron spectroscopy (XPS) study on  $\text{TiO}_2$  coating in Figure S1b shows that the film is nearly stoichiometric 1/2 Ti/O ratio with about 3 at.% of chlorine impurities. The carbon signal originates from the absorption of organics when the sample was taken out from the ALD chamber.

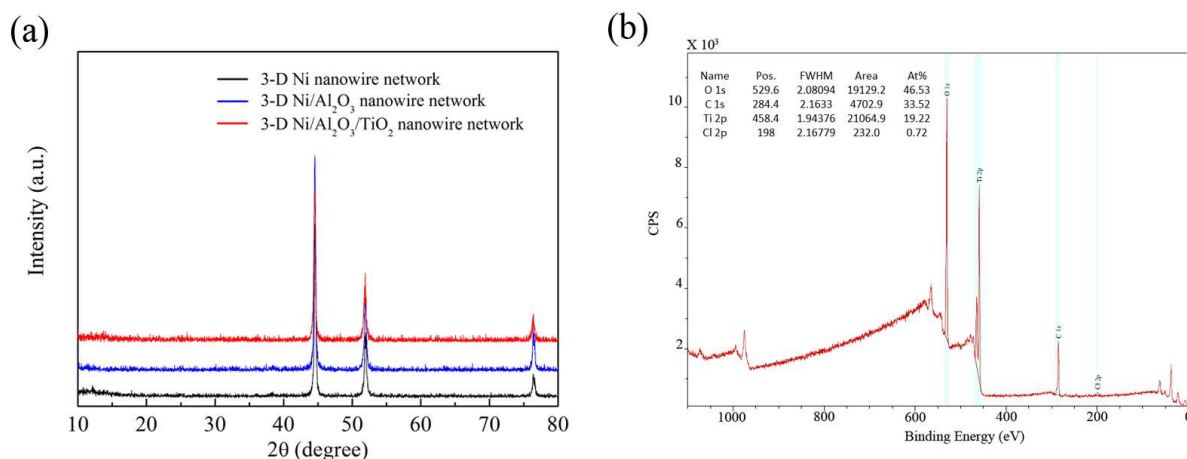

**Figure S1:** a) XRD pattern on 3-D Ni nanowire network without coating and with  $\text{Al}_2\text{O}_3$  or  $\text{Al}_2\text{O}_3/\text{TiO}_2$  coatings. b) XPS result of as-deposited ALD  $\text{TiO}_2$  film.

## 2.2 Resistivity of ALD Al<sub>2</sub>O<sub>3</sub>-coated Ni substrate

Figure S2 presents the standard I-V curve of 50 cycles ALD Al<sub>2</sub>O<sub>3</sub> coated plain Ni substrate using four-point electrical measurement. The linear I-V curve demonstrates ohmic contact between ALD Al<sub>2</sub>O<sub>3</sub>-coated Ni substrate and electrode. The resistivity is measured to be  $1.13 \times 10^{-5} \text{ ohm.cm}^{-1}$ , which is 1.6 times as much as that of pure Ni but is still very conductive. This measurement demonstrates that the ALD 50 cycles of Al<sub>2</sub>O<sub>3</sub> coating does not block the electron transport.

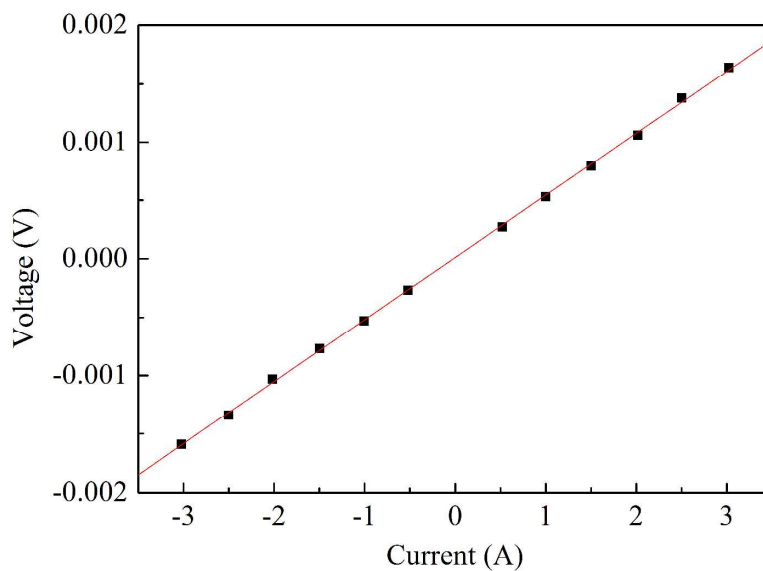

**Figure S2.** Current-voltage curve of ALD Al<sub>2</sub>O<sub>3</sub>-coated plain Ni foil.

### 2.3 Cross-sectional SEM images of the straight Ni/TiO<sub>2</sub> nanowire arrays

Figure S3 shows the surface and the cross-sectional SEM images of the straight Ni/TiO<sub>2</sub> nanowire arrays with different nanowire lengths. It shows that the nanowire arrays agglomerate as clustered nanowires. The size of nanowire clusters becomes larger from hundreds of nanometers to tens of micrometers when the length of the nanowires increases from 5  $\mu\text{m}$  to 28  $\mu\text{m}$ .

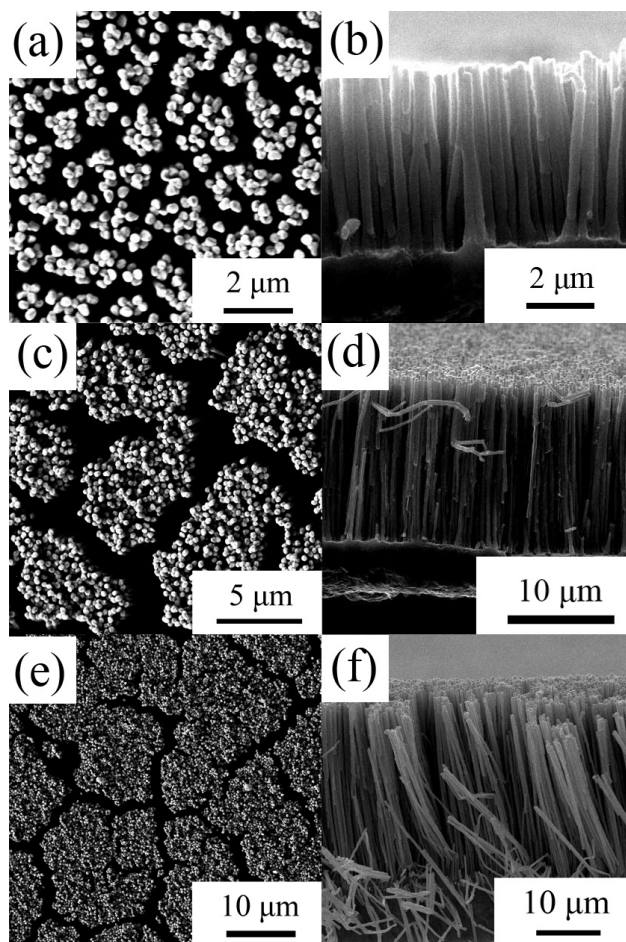

**Figure S3.** SEM images of the surface morphology and the cross-section of nanowire arrays with different lengths: a) and b) 5  $\mu\text{m}$ , c) and d) 15  $\mu\text{m}$ , and e) and f) 28  $\mu\text{m}$ .

## 2.4 Electrochemical performance of ALD $\text{Al}_2\text{O}_3$ -coated 3-D Ni nanowire network

Considering that the native oxide of Ni is hard to be completely avoided, we have characterized the electrochemical performance of a control sample, i.e., ALD 50 cycles  $\text{Al}_2\text{O}_3$ -coated 32  $\mu\text{m}$ -long 3-D Ni nanowire network without  $\text{TiO}_2$  coating, as shown in Figure S4. It shows an irreversible discharging capacity of 0.012  $\text{mAh}\cdot\text{cm}^{-2}$  at the first cycle, and a stable discharging capacity of around 0.001  $\text{mAh}\cdot\text{cm}^{-2}$  after first cycle, which is less than 1% of the capacity of 3-D Ni/ $\text{Al}_2\text{O}_3$ / $\text{TiO}_2$  nanowire network (0.16  $\text{mAh}\cdot\text{cm}^{-2}$ ).

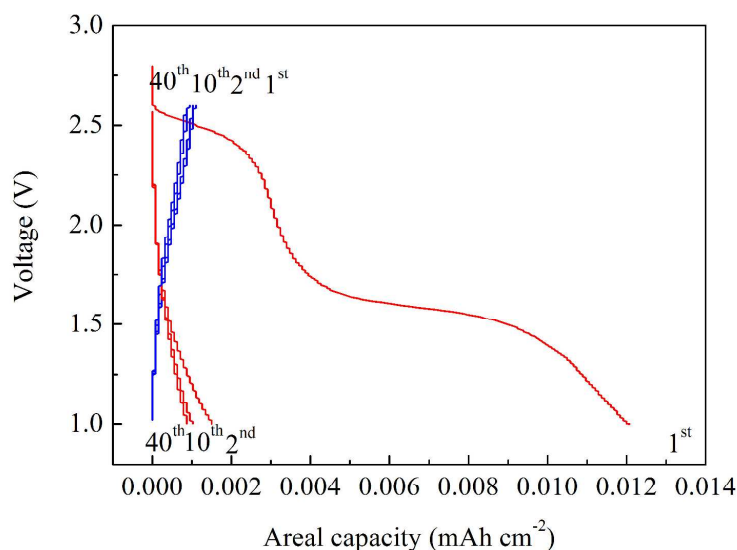

Figure S4: Galvanostatic discharging/charging curves of a control sample of 32- $\mu\text{m}$  long 3-D Ni/ $\text{Al}_2\text{O}_3$  nanowire network at a current density of 0.0016  $\text{mAh}\cdot\text{cm}^{-2}$ .

## Reference:

- (1) Li, Y. B.; Zheng, M. J.; Ma, L.; Shen, W. Z.; *Nanotechnology* **2006**, *17*, 5101
- (2) Li, A. P.; Müller, F.; Birner, A.; Nielsch, K.; Gösele, U.; *J. Appl. Phys.* **1998**, *84*, 6023
- (3) Cao, H. Q.; Wang, L. D.; Qiu, Y.; Wu, Q. Z.; Wang, G. Z.; Zhang, L.; Liu, X. W.; *ChemPhysChem* **2006**, *7*, 1500
- (4) Elam, J. W.; Groner, M. D.; George, S. M.; *Rev. Sci. Instrum.* **2002**, *73*, 2981
- (5) Cheah, S. K.; Perre, E.; Rooth, M.; Fondell, M.; Harsta, A.; Nyholm, L.; Boman, M.; Gustafsson, T.; Lu, J.; Simon, P.; Rdstrom, K.; *Nano. Lett.* **2009**, *9*, 3230
- (6) Puunrunen, R. L.; *J. Appl. Phys.* **2005**, *97*, 121301
- (7) Koltsov, S. I.; *Zhurnal prikladnoi khimii*, **1970**, *43*, 1956
- (8) Aarik, J.; Aidla, A.; Uustare, T.; Sammeleselg, V.; *J. Cryst. Growth* **1995**, *148*, 268
- (9) Jakschik, S.; Schroeder, U.; Hecht, T.; Gutsche, M.; Seidl, H.; Bartha, J. W.; *Thin Solid Films*, **2003**, *425*, 216
- (10) Groner, M. D.; Fabreguette, F. H.; Elam, J. W.; George, S. M.; *Chem. Mater.* **2006**, *16*, 639
- (11) Ferguson, J. D.; Yoder, A. R.; Weimer, A. W.; George, S. M.; *Appl. Surf. Sci.* **2004**, *226*, 393
